1 **Short Title: Root nodule development involves chromatin modification**

2 **Corresponding author:** Ton Bisseling [ton.bisseling@wur.nl](mailto:ton.bisseling@wur.nl)

3

4 **Title:** Plant-specific histone deacetylases are essential for early as well as late stages of *Medicago*  
5 nodule development

6 **Authors:** Huchen Li,<sup>a,b,c</sup> Stefan Schilderink,<sup>b,d</sup> Qingqin Cao,<sup>a,c</sup> Olga Kulikova,<sup>b</sup> Ton Bisseling<sup>a,b,1</sup>

7

8 **Affiliation:** <sup>a</sup> Beijing Advanced Innovation Center for Tree Breeding by Molecular Design, Beijing  
9 University of Agriculture, Beijing 102206, China; <sup>b</sup> Department of Plant Sciences, Laboratory of  
10 Molecular Biology, Wageningen University, Droevendaalsesteeg 1, 6708 PB Wageningen, The  
11 Netherlands; <sup>c</sup> College of Plant Science and Technology, Beijing Key Laboratory for Agricultural  
12 Application and New Technique, Beijing University of Agriculture, Beijing 102206, China; <sup>d</sup> St.  
13 Bonifatius college, Burgemeester Fockema Andreaelaan 7-9, 3582 KA Utrecht, The Netherlands  
14 (Present address); <sup>1</sup> Author for contact.

15

16 **ONE SENTENCE SUMMARY:**

17 Plant-specific histone deacetylases regulate the expression of *3-hydroxy-3-methylglutaryl-coenzyme A*  
18 *reductases* to control root nodule development.

19

20 **AUTHOR CONTRIBUTIONS:**

21 TB and HL designed the research; HL, SS, QC and OK performed the research and analysed data; HL  
22 and TB wrote the manuscript; QC and OK revised the manuscript.

23

24 **FUNDING INFORMATION:**

25 This work was supported by grants from the European Research Council (2011-AdG-294790); the  
26 supporting plan for cultivating high level teachers in colleges and universities in Beijing  
27 (CIT&TCD20180317); the national key research & development program of China  
28 (2018YFD1000605); and the construction of Beijing Science and Technology Innovation and Service  
29 Capacity in Top Subjects (CEFF-PXM2019\_014207\_000032).

30

31

## 32 ABSTRACT

33 Legume and rhizobium can establish a nitrogen-fixing nodule symbiosis. Previous studies have shown  
34 that several transcription factors that play a role in (lateral) root development are also involved in  
35 nodule development. Chromatin remodelling factors, like transcription factors, are key players in  
36 regulating gene expression. However, it has not been studied whether chromatin remodelling genes  
37 that are essential for root development get involved in nodule development. Here we studied the role  
38 of *Medicago* histone deacetylases (MtHDTs) in nodule development. Their *Arabidopsis* orthologs have  
39 been shown to play a role in root development. The expression of *MtHDTs* is induced in nodule  
40 primordia and is maintained in nodule meristem and infection zone. Conditional knock-down of their  
41 expression in a nodule-specific way by RNAi blocks nodule primordium development. A few nodules  
42 still can be formed but their nodule meristems are smaller and rhizobial colonization of the cells  
43 derived from the meristem is markedly reduced. Although the HDTs are expressed during nodule and  
44 root development, transcriptome analyses indicate that HDTs control the development of these organs  
45 in a different manner. During nodule development the MtHDTs positively regulate *3-hydroxy-3-*  
46 *methylglutaryl coenzyme a reductase 1 (MtHMGR1)*. The decreased expression of *MtHMGR1* is  
47 sufficient to explain the block of primordium formation.

48

## 49 INTRODUCTION

50 Plants are able to develop lateral organs post-embryonically. An example is the formation of lateral  
51 roots (Malamy and Benfey, 1997). Roots of legume plants have the property to form a second lateral  
52 organ, root nodules. The latter are symbiotic organs which are used to host rhizobium bacteria. These  
53 become able to reduce atmospheric nitrogen into ammonia which can be used by the host (Udvardi  
54 and Poole, 2013).

55 The model legume *Medicago (Medicago truncatula)* forms indeterminate nodules. Their histology and  
56 ontology bear resemblance to that of (lateral) roots. In both organs a meristem is present at their apex  
57 (Franssen et al., 1992; van den Berg et al., 1995), which is followed by a zone containing  
58 differentiating cells. This is the elongation zone in roots and the infection zone in nodules (Vinardell et  
59 al., 2003; Vanstraelen et al., 2009). In the latter intracellular infection by rhizobia takes place. The fully  
60 differentiated cells form the differentiated zone in roots and the fixation zone in nodules. The switch  
61 from infection to fixation zone is characterized by the sudden accumulation of starch in the infected  
62 cells (Gavrin et al., 2014). In *Medicago*, both nodules and lateral roots are developed from primordia  
63 whose formation is initiated at the protoxylem pole and starts with cell division in pericycle and  
64 subsequently divisions are induced in endodermis and cortex in both cases (Dubrovsky et al., 2001;  
65 Xiao et al., 2014; Xiao et al., 2019). Therefore nodules and lateral roots show similarities in  
66 organogenesis.

67 Recent studies showed that some transcription factors involved in (lateral) root development have  
68 been recruited for nodule development. In *Medicago*, knock-down of *PLETHORA* genes known to be

69 key regulators in root development, blocks nodule meristem activity (Aida et al., 2004; Franssen et al.,  
70 2015), and knock-out of *LOB-DOMAIN PROTEIN 16 (LBD16)* reduces both nodule and lateral root  
71 initiation (Goh et al., 2012; Schiessl et al., 2019). It is known that chromatin remodelling factors  
72 contribute to transcriptional reprogramming and also play a central role in plant organ development  
73 (Jarillo et al., 2009). However, whether chromatin remodelling factors which are involved in root  
74 development, also have a role in nodule development has never been studied.

75 Previously, we have shown that in Arabidopsis two plant-specific histone deacetylases (*AtHDT1/2*) are  
76 expressed in the root meristem, and control its size by repressing *C<sub>19</sub>-GIBBERELLIN 2-OXIDASE 2*  
77 (*AtGA2ox2*) (Li et al., 2017). Further, *AtHDTs* are markedly up-regulated in dedifferentiating pericycle  
78 cells during the initiation of lateral root primordia (De Smet et al., 2008). Medicago contains 3 *HDT*  
79 members; *Medtr4g055440*, *Medtr2g084815* and *Medtr8g069135*, they were designated as *MtHDT1*,  
80 *MtHDT2* and *MtHDT3*, respectively (Grandperret et al., 2014). Laser capture microdissection RNA  
81 sequencing (LCM-RNA-seq) analyses indicated that they all are expressed in nodule meristem and  
82 infection zone (Roux et al., 2014). Here we studied whether Medicago HDTs play a role in nodule  
83 development, and if so whether they have a similar function as in the root development.

84 We showed that the 3 *MtHDTs* are expressed in young nodule primordia. In mature nodules they are  
85 expressed in the meristem and the infection zone. Knock-down of *MtHDTs* in a nodule specific way  
86 (*ENOD12::MtHDTs RNAi*) blocks cell division in most of the nodule primordia. In the few nodules  
87 formed on RNAi transgenic roots, meristem size and activity, as well as rhizobial colonization are  
88 reduced. Transcriptome analysis of RNAi nodules showed that HDTs regulate nodule and root  
89 development in a different manner. The differentially expressed genes in RNAi nodule primordia and in  
90 mature nodules are in part overlapped, and in both cases expression of the *MtHMGR1* is reduced.

91

## 92 RESULTS

### 93 Medicago HDT2 Has A Similar Function as Arabidopsis HDT1/2 in Controlling Root 94 Development

95 To compare the functions of the Medicago HDTs with the previously characterized Arabidopsis HDTs,  
96 we first analysed the phylogenetic relationship of HDTs by using protein sequences from several  
97 dicots and the monocot rice. This showed that HDTs in rice were separated from those in dicots.  
98 Within dicots HDTs have evolved into two clades (Fig. 1A, Supplemental Table S1). The first clade  
99 contained the Arabidopsis *AtHDT3* and none of the Medicago *MtHDTs*. The second clade contained  
100 *AtHDT1*, 2, 4 and all 3 *MtHDTs*. Further, independent duplications have occurred in the 3 legume  
101 species, Medicago, Lotus and Soybean, and this have resulted in highly homologous HDT pairs. In  
102 Medicago such pair is formed by *MtHDT2* and 3. In Arabidopsis a similar independent duplication  
103 resulted in *AtHDT1* and 2. Previously, we showed that *AtHDT1* and 2 are functionally redundant and  
104 are essential for root growth. *AtHDT4* regulates root growth as well (Han et al., 2016). Therefore it is  
105 very likely that also some of the *MtHDTs* are involved in root development.

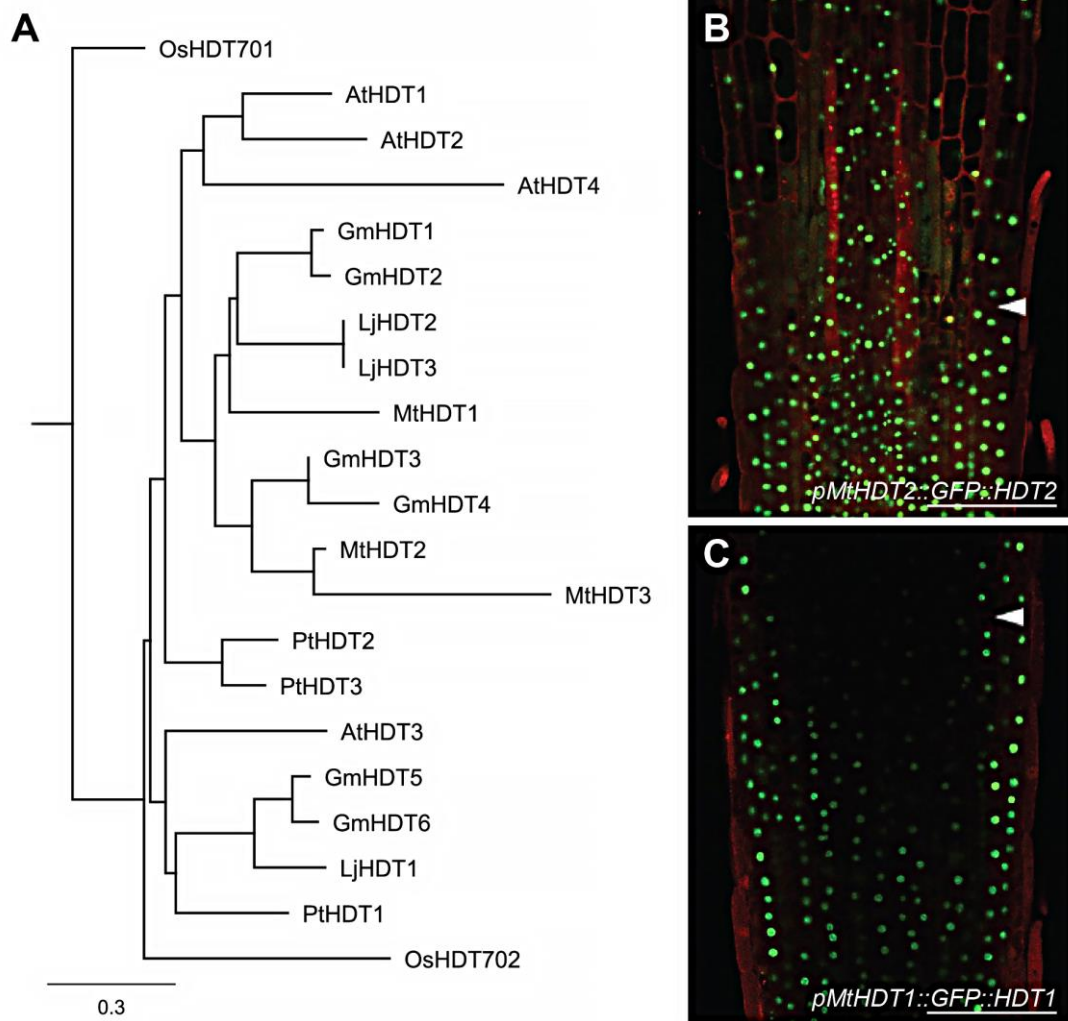

**Figure 1.** MtHDTs are orthologous to AtHDT1, 2. A, Phylogenetic tree of HDT proteins. The protein sequences are obtained from *Medicago truncatula* (Mt), *Lotus japonicus* (Lj), *Glycine max* (Gm), *Arabidopsis thaliana* (At), *Populus trichocarpa* (Pt) and *Oryza sativa* (Os). Scale bar represents substitution per site. B and C, Localization of *pMtHDT2::GFP::HDT2* (B) and *pMtHDT1::GFP::HDT1* (C) in longitudinal sections of *Medicago* root tips. Arrowheads indicate the boundary between root meristem and elongation zone. GFP signal is localized in nuclei. Scale bar=100 $\mu$ m.

106

107

108 To study whether MtHDTs have a similar expression pattern as AtHDTs in roots, we generated GFP-  
109 *MtHDT* constructs including a ~2kb DNA region upstream of the start codon (putative promoter), GFP  
110 and the corresponding *MtHDT* coding sequence (*pMtHDT1::GFP::HDT1*, *pMtHDT2::GFP::HDT2* and  
111 *pMtHDT3::GFP::HDT3*). These constructs were introduced into *Medicago* by *Agrobacterium*  
112 *rhizogenes* mediated hairy root transformation (Limpens et al., 2004). In *Medicago* roots,  
113 *pMtHDT1::GFP::HDT1* and *pMtHDT2::GFP::HDT2* were expressed in the meristem and elongation  
114 zone and GFP fluorescence was mainly detected in nucleoli (Figs. 1, B and C). In the differentiated

115 zone these fusion proteins were hardly detected. This is similar to the expression pattern and the  
116 subcellular localization of AtHDT1 and AtHDT2 in Arabidopsis root tips (Li et al., 2017). Expression  
117 level of MtHDT2 in root tips was higher than that of MtHDT1. Expression of *pMtHDT3::GFP::HDT3*  
118 was below detection level, therefore we studied the *MtHDT3* expression pattern using a  
119 *pMtHDT3::GUS* construct including the putative *MtHDT3* promoter and  $\beta$ -glucuronidase (*GUS*) coding  
120 sequence. The construct was introduced into Medicago by hairy root transformation and it showed that  
121 *pMtHDT3::GUS* was weakly expressed in the root meristem (Supplemental Fig. S1).

122 The high homology and the similar expression pattern of HDTs in Arabidopsis and Medicago roots  
123 suggests that they may control root growth in the same way. A *Mthdt2* Tnt1 mutant containing  
124 mutations either in the third exon or in the eighth intron has recently become available, but it has a  
125 wild-type like root phenotype (Supplemental Fig. S2) and for the other HDT genes mutants are not  
126 available. To determine which *MtHDT* gene is sufficient to support root growth in Arabidopsis, we  
127 introduced each *pMtHDT::GFP::HDT* construct into a double heterozygous *HDT1hdt1HDT2hdt2*  
128 Arabidopsis mutant. Loss of function of both *AtHDT1* and *AtHDT2* is lethal (Li et al., 2017), therefore  
129 we tested in the progeny of the transformed *HDT1hdt1HDT2hdt2* plants which *MtHDT* gene was able  
130 to rescue the lethal phenotype. More than 200 transformed plantlets of each progeny were genotyped,  
131 this showed that *pMtHDT2::GFP::HDT2* complemented Arabidopsis *hdt1hdt1hdt2hdt2*, whereas  
132 *pMtHDT1::GFP::HDT1* and *pMtHDT3::GFP::HDT3* did not. Further, in Arabidopsis roots  
133 *pMtHDT2::GFP::HDT2* was expressed in the meristem and elongation zone and mainly localized in  
134 nucleoli (Supplemental Fig. S3), similar to AtHDT1/2 (Li et al., 2017). The expression pattern studies  
135 and complementation test together suggest that MtHDT2 has a similar role as AtHDT1, 2 in root  
136 development. It does not exclude that MtHDT1 and 3 are also involved in root development as they  
137 are expressed in Medicago root tips.

### 138 **MtHDTs Are Expressed in the Nodule Meristem and Infection Zone**

139 In this study we especially focused on the role of MtHDTs in nodule development. As all 3 Medicago  
140 HDTs are expressed in roots, and nodule and root development are related, we studied first all 3  
141 Medicago genes. To determine where *MtHDTs* are expressed in nodules, we performed RNA *in situ*  
142 hybridisation on longitudinal sections of nodules using probe sets specific for each *MtHDT*. We used *in*  
143 *situ* hybridisation as this gives the most accurate expression pattern, especially since we could not test  
144 in Medicago whether the selected *MtHDT* promoter regions are biologically functional. The *in situ*  
145 hybridisation experiment showed that *MtHDT2* transcripts were present at a similar level in both the  
146 meristem and infection zone (Fig. 2A). In the latter, *MtHDT2* was mainly expressed in infected cells  
147 and hardly detectable in uninfected cells. This is different from roots in which *HDT* genes are only  
148 expressed in the meristem (Li et al., 2017). At the transition from infection to fixation zone, the  
149 expression of *MtHDT2* dropped dramatically. The spatial distribution of *MtHDT1* and *MtHDT3*  
150 transcripts was similar to that of *MtHDT2*, but the hybridisation signals were markedly lower (Figs 2, C  
151 and D). So like in roots, *MtHDT2* is higher expressed in nodules than the other *MtHDTs*. In addition,  
152 *MtHDT2* is certainly involved in root development. Therefore in further experiments we focused on this  
153 gene.

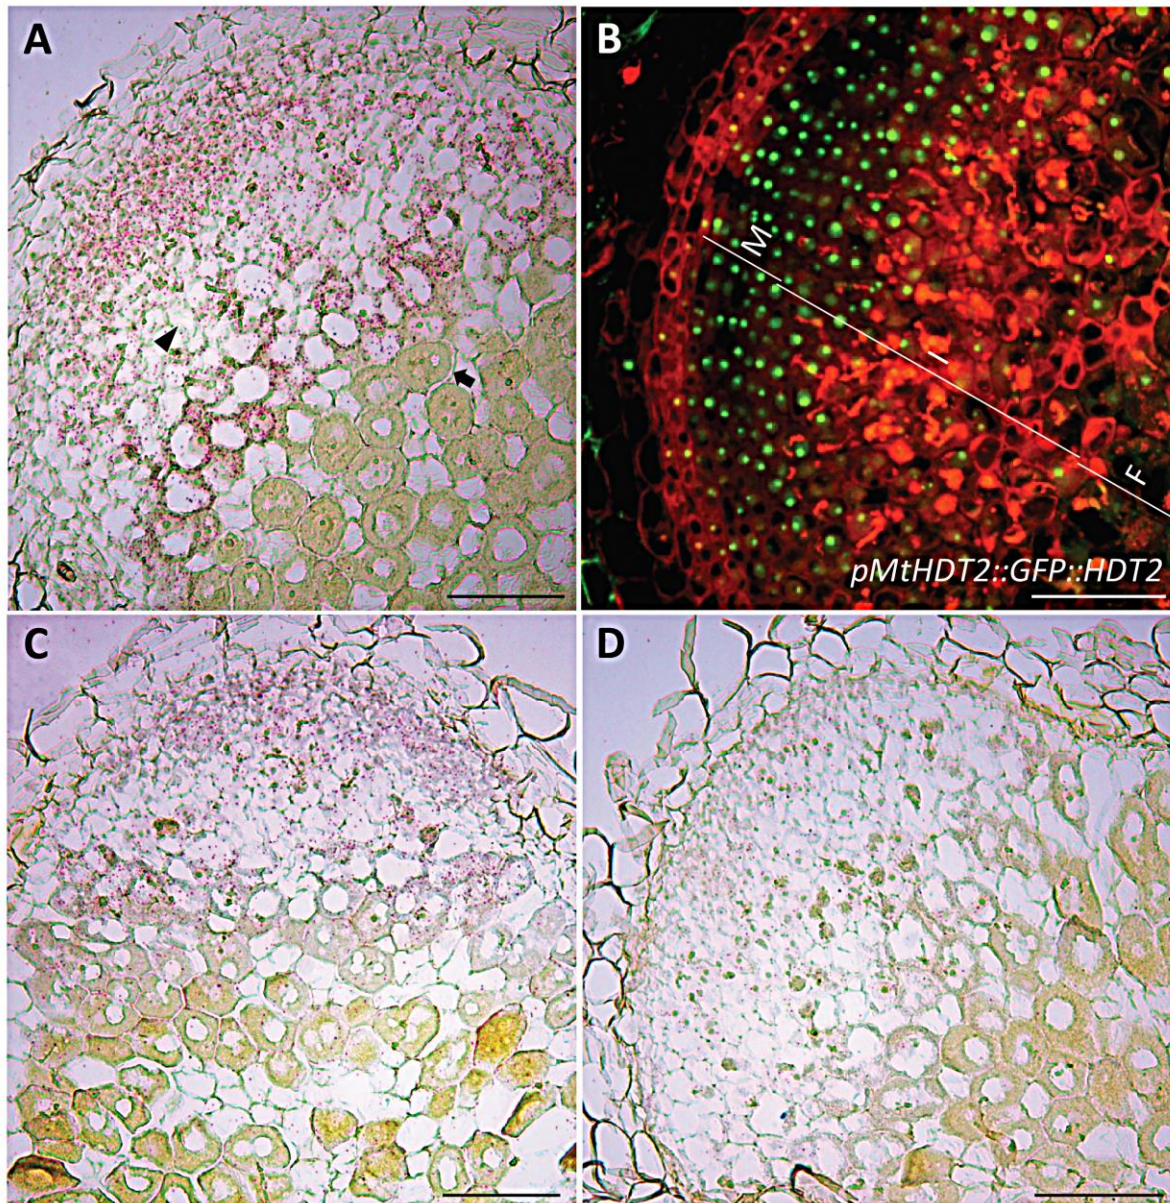

**Figure 2.** *MtHDTs* are expressed in the nodule meristem and infection zone. A, Expression of *MtHDT2* mRNA visualized by *in situ* hybridisation in wild-type *Medicago* nodules. The arrowhead indicates a non-infected cell in the infection zone, the arrow indicates a cell of the first cell layer of the fixation zone where amyloplasts are detectable at the periphery. B, Localization pattern of *pMtHDT2::GFP::HDT2* in nodules. The nodule meristem zone (M), infection zone (I) and fixation zone (F) are marked. C and D, Expression of *MtHDT1* (C) and *MtHDT3* (D) mRNA visualized by *in situ* hybridisation in wild-type *Medicago* nodules. Images are longitudinal sections of nodules harvested at 21dpi. Representative image is shown. In A, C and D, red dots are hybridisation signals. Scale bar=100 $\mu$ m.

154

155

156 To determine the subcellular localization of MtHDT2 protein in nodules, we used  
157 *pMtHDT2::GFP::HDT2* construct. This showed that MtHDT2 protein accumulated in cells of nodule  
158 meristem and infection zone, and like in roots, mainly in nucleoli. Further, at the switch from infection  
159 to fixation zone its level suddenly dropped to below detection level (Fig. 2B). So the distribution of the  
160 protein is similar to that of the transcript. Further, the expression of *MtHDT2* in meristem and infected

161 cells of the infection zone indicated that this gene might control meristem activity, rhizobial release  
162 and/or intracellular accommodation of rhizobia.

### 163 **Meristem Activity and Probably Rhizobial Colonization Require MtHDTs**

164 To determine the role of MtHDTs in nodules, we made a nodule-specific RNA interference construct to  
165 target all 3 *MtHDT* transcripts (*ENOD12::MtHDTs RNAi*). Although *MtHDT2* has the highest  
166 expression level in nodules we decided also to knock-down the other 2 *MtHDTs*, as a *MtHDT2* Tnt1  
167 mutant has no nodule phenotype (Supplemental Fig. S2). We used the *ENOD12* promoter to drive the  
168 RNAi construct as it is active in the nodule meristem and infection zone and so it covers the  
169 expression domains of the 3 *MtHDTs* (Limpens et al., 2005; Franssen et al., 2015). In the RNAi  
170 transgenic nodules *MtHDT1*, 2 and 3 were knocked-down to 22%, 7% and 29% of the levels in  
171 *ENOD12-EV* (Empty Vector) control nodules, respectively (Fig. 3A). At 21 days post inoculation (dpi),  
172 control roots formed on average 6.0 nodules/root, whereas *MtHDTs RNAi* roots had only 1.1  
173 nodules/root (Fig. 3B). Although the RNAi nodule number was low, it still allowed their histological  
174 characterization.

175 The control nodules were elongated, whereas *MtHDTs RNAi* nodules were spherical and markedly  
176 smaller (Figs 3, D and E). Longitudinal sections of control nodules (n=22) showed that meristems were  
177 present at the apex of all nodules and contained ~8 cell layers (Fig. 3D). Meristems were also present  
178 in *MtHDTs RNAi* nodules (n=20), but only had ~4 cell layers (Fig. 3E). In agreement with this reduced  
179 number of layers, expression of *MtPLT3* and *MtPLT4*, two genes that are expressed throughout the  
180 nodule meristem (Franssen et al., 2015), was reduced to 59% and 42% of the control level in *MtHDTs*  
181 *RNAi* nodules (Fig. 3C).

182 About 8 cell layers of the proximal part of the central tissue of a mature nodule are formed and  
183 infected at the primordium stage, and are not derived from the nodule meristem (Xiao et al., 2014).  
184 *MtHDTs RNAi* nodules had about 8 cell layers at the proximal part with fully infected cells. They were  
185 completely packed with elongated symbiosomes (Figs 3, D and E). This is similar to control nodules.  
186 However, the number of cell layers derived from the nodule meristem was markedly reduced (Fig. 3F).  
187 Further, in the infected cells in these layers the colonization level was rather low, resulting in cells with  
188 large vacuoles and few bacteria. Collectively, these data showed that in the *MtHDTs RNAi* nodules  
189 knock-down of *MtHDTs* reduced nodule meristem size, and it affected the rhizobial colonization  
190 process in cells derived from the meristem, but not from primordium cells.

### 191 **Knock-down of *MtHDTs* Affects Nodule Primordium Development**

192 As nodule number was markedly reduced on the RNAi roots we assumed that nodule primordium  
193 formation was affected. To test this, we transformed Medicago *ENOD11::GUS* plants (Boisson-Dernier  
194 et al., 2005) with the *MtHDTs RNAi* and *ENOD12-EV* construct, respectively, by hairy root  
195 transformation. The *ENOD11* promoter is active in the whole young nodule primordia, and it is only  
196 expressed in 1 or 2 cell layers adjacent to root vasculature in lateral root primordia (Supplemental Fig.

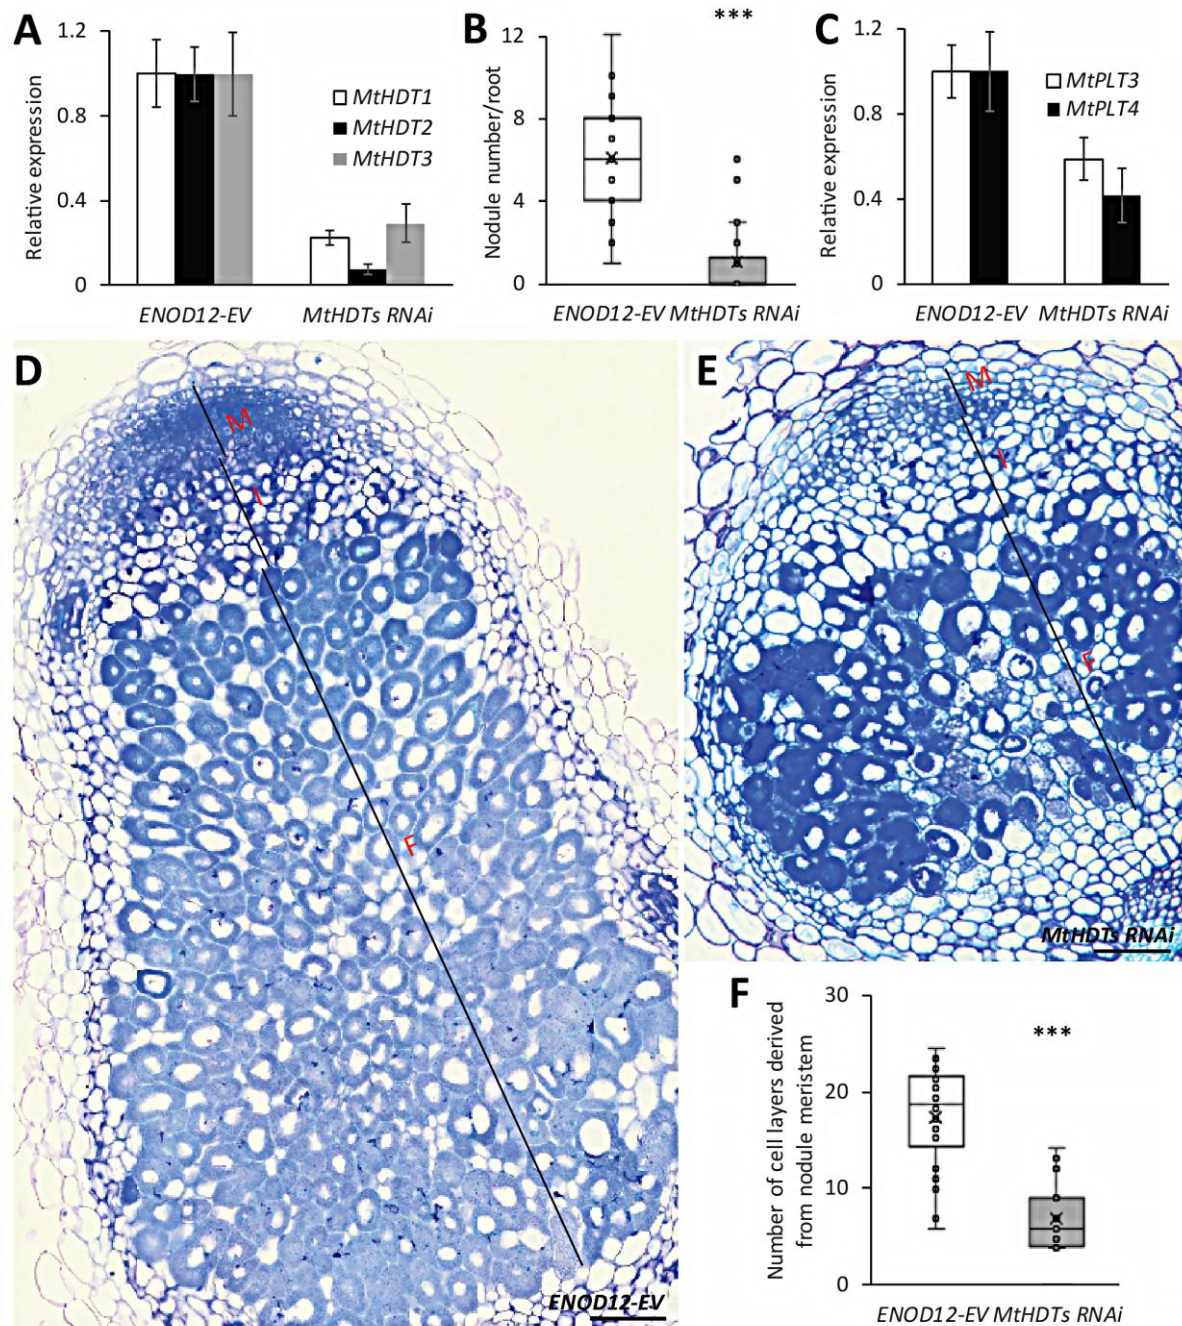

**Figure 3.** Knock-down of *MtHDTs* affects nodule meristem functioning and rhizobial colonization. **A**, Reverse transcription quantitative PCR (RT-qPCR) analysis of *MtHDTs* expression in *ENOD12-EV* control and *MtHDTs RNAi* nodules. **B**, Nodule number formed per *ENOD12-EV* and *MtHDTs RNAi* transgenic root ( $n > 20$ ). **C**, RT-qPCR analysis of *MtPLT3*, 4 expression in *ENOD12-EV* control and *MtHDTs RNAi* nodules. **D** and **E**, Morphology of *ENOD12-EV* (**D**) and *MtHDTs RNAi* (**E**) nodules studied by light microscopy. Representative longitudinal sections are shown. The nodule meristem (**M**), infection zone (**I**) and fixation zone (**F**) are marked. Scale bar=100 $\mu$ m. **F**, Number of cell layers derived from nodule meristem in *ENOD12-EV* and *MtHDTs RNAi* transgenic nodules ( $n > 15$ ). Nodules were harvested at 21dpi. Panels in **A** and **C** show mean $\pm$ SEM determined from three independent experiments. Asterisks in **B** and **F** indicate significant differences (\*\*\*,  $p < 0.001$ ; Student's *t* test).



198 S4). So it facilitates to distinguish nodule and lateral root primordia and to accurately count nodule  
199 primordium number.

200 Rhizobia were spot inoculated at the susceptible zone of 110 transgenic *ENOD12-EV* and 110  
201 *MtHDTs RNAi* roots with a similar length. After 5 days, 99 control and 102 *MtHDTs RNAi* inoculated  
202 roots formed nodule primordia expressing *ENOD11*. The inoculated root segments with nodule  
203 primordia (~0.3cm) were embedded in plastic and sectioned to study till which stage nodule primordia  
204 had developed. In case of root segments containing more than one primordium, only the largest  
205 nodule primordium was counted. We successfully characterized 87 and 86 control and *MtHDTs RNAi*  
206 segments, respectively. This showed that in control roots, 90% (78 out of 87) of nodule primordia  
207 passed stage II and a relatively high number of them (54%, 47 out of 87) developed into or passed  
208 stage V (Fig. 4A). In contrast, on *MtHDTs RNAi* transgenic roots, the majority of nodule primordia  
209 (59%, 51 out of 86) were in stage I or stage II, only few *MtHDTs RNAi* nodule primordia (7%, 6 out of  
210 86) had developed into or passed stage V (Fig. 4A). This suggested that the development of the  
211 majority of *MtHDTs RNAi* nodule primordia was blocked at an early stage, which is consistent with  
212 reduced nodule number at 21dpi (Fig. 3B).

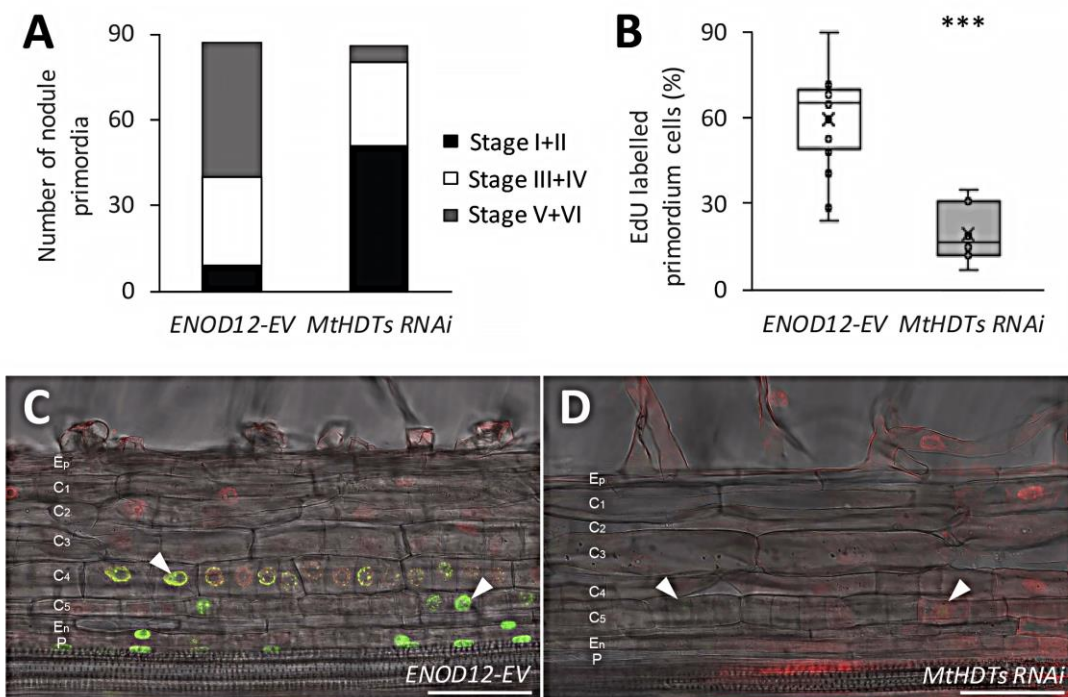

**Figure 4.** Knock-down of *MtHDTs* blocks nodule primordium development. A, Analysis of developmental stages of 5dpi *ENOD12-EV* (n=87) and *MtHDTs RNAi* (n=86) nodule primordia. B, Percentage of EdU labelled nodule primordium cells in 2dpi *ENOD12-EV* (n=15) and *MtHDTs RNAi* (n=7) nodule primordia. Nodule primordium cells were defined as divided or dividing cells that have smaller size. 8 *MtHDTs RNAi* nodule primordia have no EdU labelling and are not used for statistics. Asterisk indicates significant differences (\*\*\*,  $p < 0.001$ ; Student's *t* test). C and D, EdU signals in 2dpi *ENOD12-EV* (C) and *MtHDTs RNAi* (D) nodule primordia. Arrowheads indicate strong (C) or weak (D) green fluorescent signals in nuclei. Identical confocal microscope settings were used in C and D. P, Pericycle; En, Endodermis; C<sub>5/4/3/2/1</sub>, the fifth/fourth/third/second/first cortical cell layer; Ep, Epidermis. Scale bar=100µm.

213

214

215 To further support that *MtHDTs RNAi* nodule primordia were blocked in development, root segments  
216 containing nodule primordia were collected at 2 days after spot inoculation, they were then incubated  
217 for 2 hours with EdU, that is incorporated into replicating DNA during mitosis (Kotogany et al., 2010).  
218 By quantifying the percentage of EdU labelled nodule primordium cells, we could determine whether  
219 knock-down of *MtHDTs* reduced mitotic activity in young primordia. 15 control and 15 *MtHDTs RNAi*  
220 nodule primordia were analysed. All control nodule primordia had EdU labelled cells, and on average  
221 62% of the primordium cells were labelled (Figs 4, B and C). In contrast, only 47% (7 out of 15) of  
222 *MtHDTs RNAi* nodule primordia had EdU labelled cells and in these primordia the percentage of  
223 labelled cells had markedly dropped to 20% (Figs. 4, B and D). Further, the intensity of fluorescence in  
224 EdU labelled cells was reduced in comparison with that in control primordia (Figs. 4, C and D).  
225 Therefore, we concluded that the development of the majority of *MtHDTs RNAi* nodule primordia had  
226 been blocked at the early stages.

### 227 ***MtHDTs* Are Expressed in Young Nodule Primordia**

228 The block of *MtHDTs RNAi* nodule primordium development prompted us to study whether *MtHDTs*  
229 were expressed in nodule primordia. We first performed RNA *in situ* hybridisation for *MtHDT2*, as it  
230 has the highest expression level, on longitudinal sections of nodule primordia. Cell divisions in  
231 Medicago nodule primordia occur first in the pericycle and subsequently in the fifth cortical layer (C<sub>5</sub>)  
232 (Xiao et al., 2014). Such an early stage nodule primordium (stage I/II) is shown in Fig. 5A, *MtHDT2*  
233 transcripts were present in dividing pericycle and C<sub>5</sub> cells. Cell divisions in endodermis are initiated  
234 shortly after that in C<sub>3</sub> during nodule primordium development (Xiao et al., 2014). Fig. 5B shows a  
235 primordium at stage III, in which cell divisions have occurred in C<sub>3</sub>, but not in endodermis yet.  
236 However, *MtHDT2* transcripts were detected in nuclei of endodermal cells, indicating that *MtHDT2*  
237 starts to express in cells prior to division.

238 As the expression level of *MtHDT1, 3* is rather low, we were not able to study their expression in  
239 primordia with *in situ* hybridisation. Therefore, the expression patterns of *MtHDT1* and *MtHDT3* in  
240 nodule primordia was studied by using promoter-GUS constructs. The *pMtHDT1::GUS* construct was  
241 generated by fusing the *MtHDT1* putative promoter with *GUS* coding region and the *pMtHDT3::GUS*  
242 construct was as aforementioned. These two constructs were introduced into Medicago by hairy root  
243 transformation and transgenic roots were inoculated with rhizobia. We first analysed their expression  
244 pattern in nodules. The GUS expression patterns were consistent with RNA *in situ* hybridisation (Figs.  
245 2, C and D; Supplemental Figs. S5, A and B), indicating that the putative promoters are sufficient to  
246 create the correct gene expression pattern. In nodule primordia, both *MtHDT1* and *MtHDT3* promoters  
247 showed a similar expression pattern as *MtHDT2* (Supplemental Figs. S5, C and D). The expression of  
248 *MtHDTs* in young primordia indicates that they have a role in nodule primordium initiation and  
249 development.

250

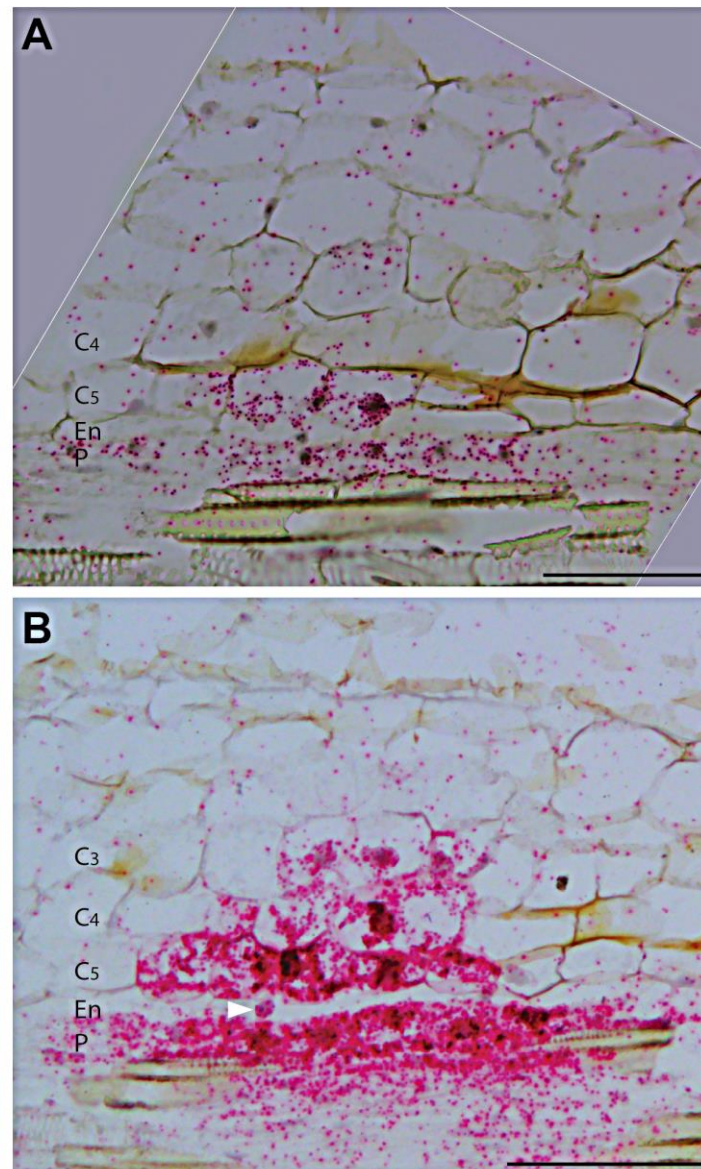

**Figure 5.** *MtHDT2* is expressed in nodule primordia. *In situ* hybridisation pattern of *MtHDT2* mRNA in nodule primordia at stage I (A) and stage III (B). Longitudinal sections of wild-type nodule primordia are shown. Red dots are hybridisation signals. Divided and dividing primordium cells are distinguished by their small size. Arrowhead in B indicates a nucleus from an endodermal cell that has not divided. P, Pericycle; En, Endodermis; C<sub>5/4/3</sub>, the fifth/fourth/third cortical cell layer. Scale bar=100µm.

251

252

### 253 **Knock-down of *MtHDTs* Alters Gene Expression in Nodules**

254 HDT proteins are known to regulate chromatin status by which they contribute to the regulation of  
255 transcription of genes (Kouzarides, 2007). To investigate which genes are regulated by MtHDTs, RNA-  
256 seq analyses were conducted. We isolated RNA from nodules, as it was not well possible to collect  
257 sufficient primordium material and especially because the majority of the *MtHDTs RNAi* primordia

258 were blocked in development, this might have caused secondary effects. We collected apical part of  
259 nodules including meristem and infection zone as *MtHDTs* are preferentially expressed there. To  
260 dissect them from the fixation zone, transgenic control and *MtHDTs RNAi* roots were inoculated with  
261 rhizobia expressing *nifH::GFP*. The *nifH* gene is switched on at the transition from infection to fixation  
262 zone (Gavrin et al., 2014), where *MtHDTs* are also switched off. We will name the part, containing  
263 meristem and infection zone, nodule apex.

264 Transcriptomes of control and *MtHDTs RNAi* nodule apices were analysed and we detected the  
265 transcripts of ~20,000 genes in each sample (Supplemental Dataset S1). The reduced expression  
266 level of *MtHDTs* and *MtPLT3,4* in *MtHDTs RNAi* nodule apices is consistent with qRT-PCR data  
267 (FigS.3, A and C; Supplemental Dataset S1), indicating that RNA-seq data are reliable. To identify  
268 differentially expressed genes (DEGs), we performed relatively stringent statistics and filtering (fold  
269 change>4 and FDR p-value<0.05). In total 49 DEGs were identified between control and *MtHDTs*  
270 *RNAi* nodule apices (Supplemental Dataset S1).

271 To investigate whether HDTs control nodule development by regulating the same genes as in  
272 Arabidopsis roots, we first checked the expression of *GA2ox* genes as they are targets of HDTs in  
273 Arabidopsis roots (Li et al., 2017). However, *MtGA2ox* genes, were not among the 49 DEGs  
274 (Supplemental Dataset S1), suggesting that HDTs regulate nodule and root development in a different  
275 way. To further test this, we compared the DEGs that are identified in Medicago nodule apices (n=49)  
276 with those of Arabidopsis root tips (n=217) (Li et al., 2017). Gene orthology of the two species is well  
277 studied (van Velzen et al., 2018). 63% (31 out of 49) of the Medicago DEGs have (an) orthologous  
278 gene(s) in Arabidopsis, but only the 2 *HDT* genes (*MtHDT1/2*, *AtHDT1/2*) were down-regulated in both  
279 RNAi experiments (Supplemental Dataset S2). This demonstrated that none of the DEGs, that is the  
280 result of down-regulation of HDTs, was in common in Arabidopsis roots and Medicago nodules. We  
281 concluded that HDTs regulate nodule and root development in a different way.

282 To obtain insight in the biological functions of the identified 49 DEGs from nodule apices, we  
283 performed Gene Ontology (GO) analysis. This showed that genes encoding proteins with terpene  
284 synthase, methyltransferase or oxidoreductase activities were enriched among the DEGs  
285 (Supplemental Fig. S6).

### 286 **MtHDTs Possibly Control Nodule Development by Regulating *MtHMGR1* Expression**

287 Two DEGs encode 3-hydroxy-3-methylglutaryl-coenzyme A reductases (*MtHMGR1* and *MtHMGR4*).  
288 These two genes were down-regulated 8.7 (*MtHMGR1*) and 7.7 (*MtHMGR4*) fold in *MtHDTs RNAi*  
289 nodule apices, respectively (Supplemental Dataset S1). Previously, it has been shown that knock-  
290 down of *MtHMGR1* blocks nodule formation (Kevei et al., 2007). The function of *MtHMGR1* in mature  
291 nodules has not been studied, but it has been shown to be an interactor of *MtDMI2* (Kevei et al.,  
292 2007). Knock-down of *MtDMI2* in nodules affects the intracellular colonization of rhizobia (Limpens et  
293 al., 2005), similar to that in *MtHDTs RNAi* nodules. Therefore we focused on *MtHMGR1*.

294 To determine in which tissue *MtHMGR1* is expressed and whether knock-down of *MtHDTs* affects its  
295 expression pattern, we performed RNA *in situ* hybridisation on longitudinal sections of nodules  
296 harvested at 21dpi. In control nodules, *MtHMGR1* was expressed in nodule meristem and the infection  
297 zone, in the latter its expression only occurred in the infected cells (Fig. 6A). In *MtHDTs RNAi* nodules,  
298 *MtHMGR1* had the same expression pattern (Fig. 6B), albeit at a markedly lower level (Supplemental  
299 Dataset S1).

300 It has been shown that knock-down of *MtHMGR1* blocks nodule primordium development, similar to  
301 the phenotype of the inoculated *MtHDTs RNAi* roots. We then asked whether the expression pattern  
302 and level of *MtHMGR1* in nodule primordia was affected by knocking-down of *MtHDTs*. To answer  
303 this, RNA *in situ* hybridisation with *MtHMGR1* probe set was performed on longitudinal sections of 5dpi  
304 nodule primordia. In control nodule primordia (stage V), *MtHMGR1* transcripts were very abundant in  
305 (future) meristem and infected cells (Fig. 6C). Expression pattern of *MtHMGR1* in *MtHDTs RNAi*  
306 nodule primordia (stage V) resembled that of the control (Fig. 6D) albeit at a reduced level. qRT-PCR  
307 confirmed this reduced expression level (Fig. 6F). This is in line with the observation in mature nodules  
308 where knock-down of *MtHDTs* does not affect *MtHMGR1* expression pattern, but only reduced its  
309 expression level (Figs.6, A and B; Supplemental Dataset S1).

310 In nodules the expression pattern of *MtHMGR1* coincides with that of the *MtHDTs* (Fig. 2; Figs. 6, A  
311 and B). To test whether in nodule primordia *MtHMGR1* and *MtHDTs* were expressed in the same cells  
312 as well, we performed RNA *in situ* hybridisation with *MtHDT2* probe set on longitudinal sections of 5dpi  
313 nodule primordia. This revealed that in nodule primordia (Stage V) *MtHDT2* was also expressed in the  
314 future nodule meristem and infected cells (Fig. 6E), similar to *MtHMGR1*.

315 Taken together, our data showed that *MtHDTs* and *MtHMGR1* were co-expressed during nodule  
316 development. Knock-down of *MtHDTs* did not affect the expression pattern of *MtHMGR1*, but only its  
317 expression level.

318

## 319 **DISCUSSION**

320 In this study, we showed that the *MtHDTs* play a key role in both nodule primordium formation and  
321 nodule development. Knock-down of *MtHDTs* caused a block of primordium development and in  
322 nodules it reduced meristem size and rhizobial colonization of cells. In both cases these chromatin  
323 remodelling factors positively regulate the expression of *MtHMGR1* that previously has been shown to  
324 be essential for nodule primordium formation (Kevei et al., 2007). The similar nodule primordium  
325 phenotype in *MtHDTs* and *MtHMGR1* knock-down indicates that the decreased expression of  
326 *MtHMGR1* is sufficient to explain the arrested nodule primordium development in *MtHDTs RNAi*. The  
327 mechanism by which they control nodule (primordium) development is different from that involved in  
328 root development.

329

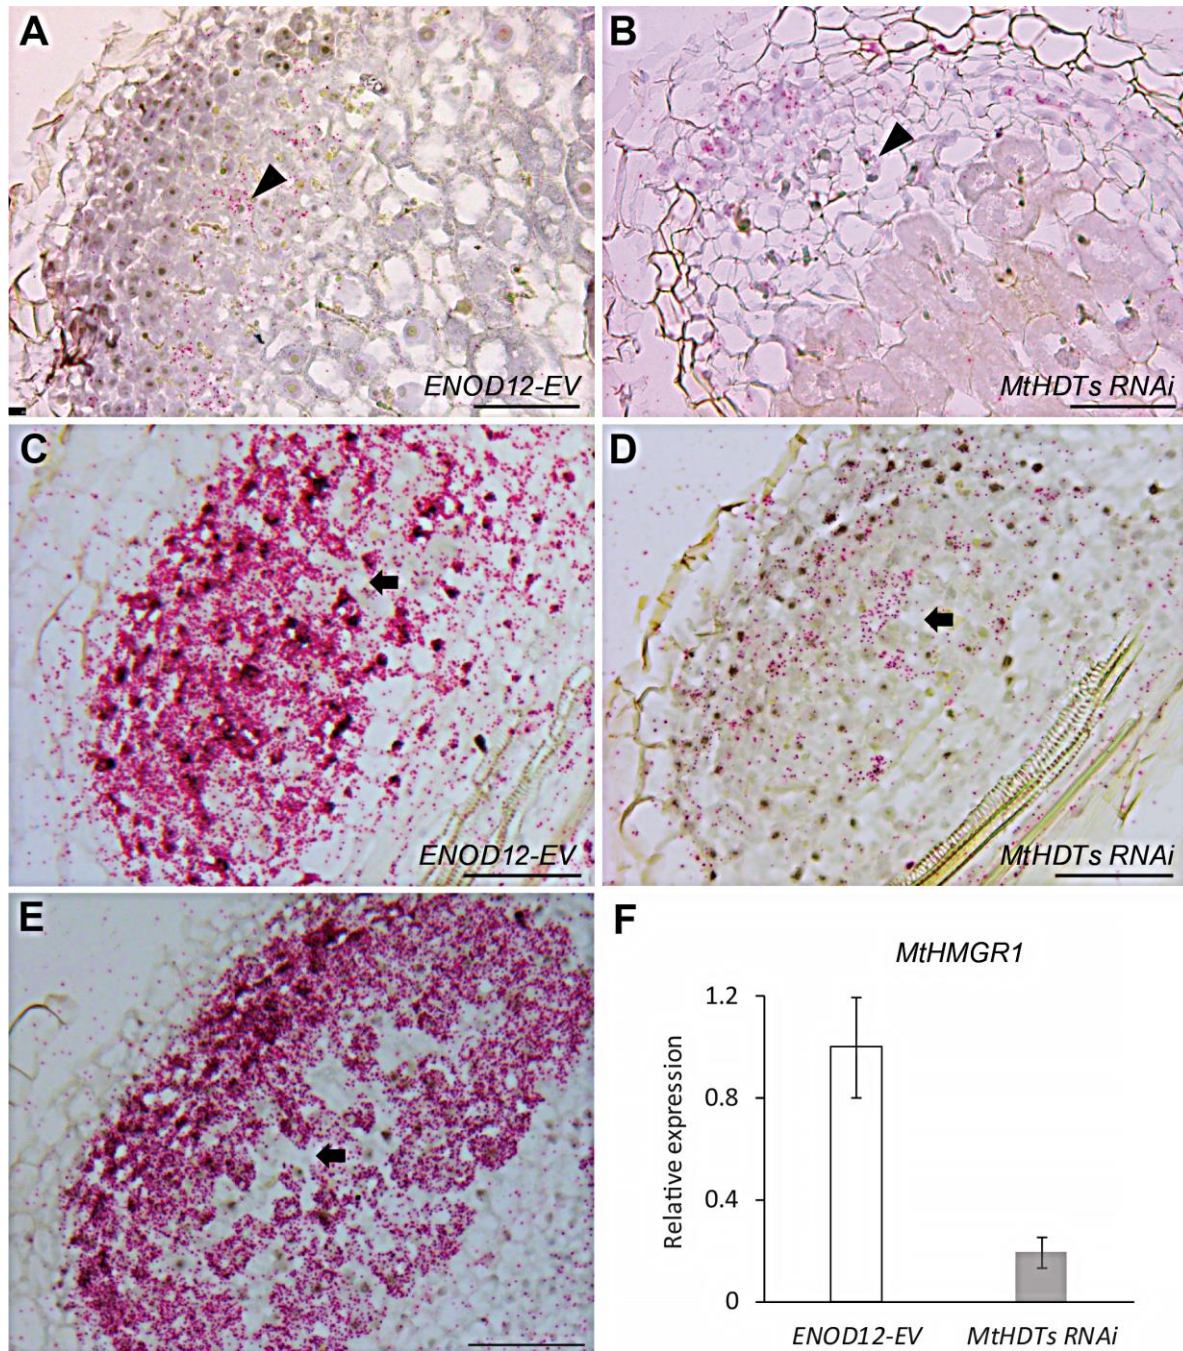

**Figure 6.** MthDTs regulate the expression of *MthMGR1*. A and B, *In situ* hybridisation pattern of *MthMGR1* mRNA in *ENOD12-EV* (A) and *MthDTs RNAi* (B) nodules. Arrowheads indicate infected cells in the infection zone. C and D, *In situ* hybridisation pattern of *MthMGR1* mRNA in *ENOD12-EV* (C) and *MthDTs RNAi* (D) nodule primordia. Arrows indicate non-infected cells. E, *In situ* hybridisation pattern of *MthDT2* mRNA in wild-type nodule primordium. The arrow indicates a non-infected cell. F, RT-qPCR analysis of *MthMGR1* expression in *ENOD12-EV* control and *MthDTs RNAi* nodule primordia. Data shown is mean $\pm$ SEM determined from three independent experiments. Nodules and nodule primordia were harvested at 21dpi and 5dpi, respectively. In A to E longitudinal sections of nodules (A and B) or nodule primordia (C to E) were shown. Red dots are hybridisation signals. Scale bar=100 $\mu$ m.

330

331

332

333 We did not study the role of MtHDTs in Medicago root development. However, it seems probable that  
334 their function is similar to that of AtHDT1/2 in Arabidopsis roots. Firstly, this conclusion is supported  
335 by the fact that the MtHDTs and AtHDT1 and 2 have the same expression pattern in roots. Secondly,  
336 *pMtHDT2::GFP::HDT2* is sufficient to restore root development in an Arabidopsis *hdt1hdt1hdt2hdt2*  
337 background. AtHDT1, 2 regulate root meristem size by repressing *AtGA2ox2* (Li et al., 2017).  
338 Therefore it is very probable that MtHDT2 has a similar function when expressed in Arabidopsis and it  
339 is likely that MtHDTs control Medicago root growth in a similar manner. If this is indeed the case, the  
340 mechanism by which MtHDTs regulate nodule meristem size is different, as expression of *MtGA2oxs*  
341 is not affected in *MtHDTs RNAi* nodule apices. Further none of the Arabidopsis orthologues of the  
342 Medicago nodule DEGs is affected in the Arabidopsis *HDTs RNAi* roots. In addition, the expression  
343 pattern of the *MtHDTs* in nodules and roots is not similar. In nodules the *MtHDTs* are expressed at  
344 equal levels in meristem and infection zone. The latter is equivalent to the root elongation zone.  
345 However, in roots the *MtHDTs* are expressed at the highest level in the meristem, whereas in the  
346 elongation zone their expression level is very low.

347 It has been shown that the nodule and root developmental programmes share transcription factors like  
348 PLETHORA and LBD16. It is possible that during the development of these two organs different genes  
349 are regulated by these transcription factors. For example during nodule development LBD16 interacts  
350 with a CCAAT box-binding protein Nuclear Factor-Y (NF-YA1), the latter is a nodule-specific  
351 transcription factor. The expression of *LBD16* is directly regulated by NODULE INCEPTION (NIN)  
352 (Schiessl et al., 2019; Soyano et al., 2019). NIN is nodule-specific transcription factor as well (Combiere  
353 et al., 2006; Marsh et al., 2007), indicating that the expression of *LBD16* is also regulated differently  
354 during the development of both organs. Further, 96% of the transcriptional changes are shared with  
355 *nin* and *lbd16* loss-of-function mutants. It is probable that the genes regulated by LBD16 during the  
356 development of both organs are not completely identical. Our study shows that chromatin remodelling  
357 factors *HDTs* are involved in root and nodule development, and their targets in these two processes  
358 are also different. So although root and nodule development share several regulators, it is possible  
359 that they have different functions.

360 Another chromatin remodelling factor, DNA demethylase (*MtDME*) has been shown to be expressed in  
361 nodule infected cells. Knock-down of this gene does not decrease nodule number, but reduces the  
362 endoreduplication level of infected cells (Satge et al., 2016). *MtDME* is expressed at a low level in  
363 roots and its role in root development has not been studied. So whether it has a similar function in  
364 roots and nodules is unknown. During nodule development, *MtDME* first becomes active when  
365 rhizobial infection into cortical cells has already taken place. We show that *MtHDTs* are induced much  
366 earlier than *MtDME*, since the expression of *MtHDTs* is detected in nodule primordium cells prior to  
367 division (Fig. 5; Supplemental Fig. S5). Similar to this, during initiation of lateral root primordium,  
368 *AtHDT1/2* are induced in founder cells before the first cell division occurs (De Smet et al., 2008),  
369 suggesting that HDTs control the organogenesis of the two lateral organ primordia from the start.

370 It is well possible that more chromatin remodelling factors are shared between root and nodule  
371 development. Except *HDTs*, another 5 chromatin remodelling genes are up-regulated in Arabidopsis  
372 early lateral root primordium and their orthologs are up-regulated in Medicago roots inoculated with  
373 rhizobia (Supplemental Table S2) (Benedito et al., 2008; De Smet et al., 2008), it will be worthwhile to  
374 compare their function during root and nodule development.

375 Knock-down of the 3 *MtHDTs* resulted in a nodule phenotype, whereas the only available Medicago  
376 *hdt2* single mutant makes WT-like nodules, suggesting a functional redundancy of MtHDTs. Similarly,  
377 in Arabidopsis, both *AtHDT1* and 2 control root development and leaf polarity (Ueno et al., 2007; Li et  
378 al., 2017). The redundancy might be due to the fact that *AtHDTs* as well as *MtHDTs* are the result of a  
379 recent gene duplication. In some monocots such duplication has not occurred (Pandey et al., 2002;  
380 Grandperret et al., 2014), and knock-down of a single *OshDT701* (Fig. 1A) gene in rice enhances  
381 resistance to pathogens (Ding et al., 2012).

382 Silencing of *MtHDTs* resulted in a block of nodule primordium formation. We used the *ENOD12*  
383 promoter to silence the *MtHDTs*. During nodule primordium initiation the activation of this promoter  
384 could only be detected in pericycle and inner cortex when cell division has already occurred  
385 (Supplemental Fig. S7). This implies that most likely silencing is first effective when primordium  
386 formation has already been initiated. Therefore it is well possible that MtHDTs are essential from the  
387 start of primordium initiation. In Arabidopsis roots, silencing of *AtHDT1,2* does not affect progression  
388 through the cell cycle. However, in most nodule primordia present in *MtHDTs RNAi* roots DNA  
389 synthesis is blocked or markedly reduced indicating that cell division is (getting) blocked in these  
390 primordia (Fig. 4). This further supports that HDTs have different roles in root and nodule  
391 development.

392 Although the MtHDTs are important for primordium development, still a few nodules were formed on  
393 *MtHDTs RNAi* roots. Most likely in these cases expression of *MtHDTs* is not sufficiently reduced to  
394 block primordium development. In mature Medicago nodules the ~8 proximal cell layers with infected  
395 cells are derived from the primordium and not from the meristem (Xiao et al., 2014). In the few nodules  
396 formed on *MtHDTs RNAi* roots, rhizobial colonization is not affected in these infected cells derived  
397 from the primordium, but it is strongly reduced in cells of the infection zone derived from the nodule  
398 meristem. This difference in efficiency of colonization is in agreement with the idea that rhizobial  
399 infection in nodule cells is more stringently controlled than in primordium cells (Combier et al., 2006;  
400 Laporte et al., 2014).

401 The expression of *MtHDTs* in nodule meristem and infection zone is consistent with their function in  
402 colonization of infected cells, as well as in specifying nodule meristem properties. Considering that the  
403 *MtHDTs RNAi* nodule meristem is smaller, the reduced colonization in cells derived from this meristem  
404 might be the indirect effect of altered properties of the meristem cells. The cells of the meristem of  
405 these nodules still divide, whereas *MtHDTs RNAi* results in a block of cell division in primordia.  
406 However, the nodules are formed from primordia in which cell division is not (fully) blocked, most likely  
407 due to less reduction of the *MtHDTs* mRNA levels.



408 At the transition from infection to fixation zone, *MtHDT2* expression level dropped dramatically (Fig.  
409 2A). At this transition several other sudden changes occur, including accumulation of starch in the  
410 infected cells, collapse of the vacuole of the infected cells and the induction of *nifH* genes of the  
411 rhizobia (Gavrin et al., 2014). So the sudden decrease of *MtHDT* transcripts and proteins supports the  
412 existence of a molecular switch at this transition.

413 Expression patterns of *MtHMGR1* and *MtHDTs* overlapped in both nodule primordia and nodules  
414 (Figs. 2 and 6), indicating that *MtHDTs* regulate *MtHMGR1* expression in a cell autonomous manner.  
415 *MtHMGR1* is down-regulated in *MtHDTs RNAi* primordia as well nodules and the transcriptome  
416 studies shows that all other *MtHMGR* members are down-regulated in *MtHDTs RNAi* nodule apices  
417 (Supplemental Dataset 1). They encode enzymes that catalyse the rate-limiting step in the mevalonate  
418 pathway. This pathway leads to the synthesis of sterols and isoprenoids, that give rise to several plant  
419 hormones, for example cytokinin, gibberellin and abscisic acid (Chappell et al., 1995). Whether the  
420 disturbed isoprenoid biosynthesis results in the *MtHDTs RNAi* phenotype cannot be excluded.  
421 However, it has also been shown that *MtHMGR1* knock-down affects Nod factor signalling as it blocks  
422 rhizobium induced  $Ca^{2+}$  spiking in the epidermis (Venkateshwaran et al., 2015). As Nod factor  
423 signalling is required for nodule primordium formation this function can explain the primordium  
424 phenotype in both *MtHMGR1* and *MtHDTs RNAi* (as in the latter the expression of *MtHMGR1* is  
425 reduced). Nod factor signalling also occurs in the distal part of the infection zone. Knock-down of Nod  
426 factor receptor genes as well as an essential component of the Nod factor signalling cascade *DMI2*  
427 results in reduced colonization of rhizobia in nodule cells (Limpens et al., 2005; Moling et al., 2014).  
428 This phenotype is similar to that of the *MtHDTs RNAi* nodules. So in case *MtHMGR1* is required for  
429 Nod factor signalling at early stages as well as in the nodule its reduced expression can explain the  
430 *MtHDTs RNAi* nodule primordium and nodule phenotypes.

431

## 432 MATERIALS AND METHODS

### 433 Plant Growth, Transformation and Rhizobial Inoculation

434 *Medicago* ecotype Jemalong A17 and *ENOD11::GUS* stable line (Journet et al., 2001) were used in this  
435 study. *Agrobacterium rhizogenes* MSU440 mediated hairy root transformation was performed according  
436 to (Limpens et al., 2004). The composite plants with transgenic roots were grown either in perlite  
437 saturated with low nitrate containing Farhaeus medium (Fahraeus, 1957), or on plates with agarose-  
438 based BNM medium (Ehrhardt et al., 1992), at 21°C in a 16 h : 8 h, light : dark regime. *Sinorhizobium*  
439 *melloti* 2011 or *S. melloti* expressing *nifH::GFP* (Gavrin et al., 2014) liquid cultures were treated with  
440 10µM luteolin for 24 hours, and then used to inoculate *Medicago* roots. Mature nodules were harvested  
441 at 21 days post inoculation (dpi) from roots of *Medicago* plants growing in perlite. Nodule primordia were  
442 harvested at 2 or 5 dpi from spot inoculated roots of *Medicago* plants growing on plates.

### 443 Phylogenetic Tree Construction

444 Gene accession number of *HDTs* are shown in Supplemental Table S1. For phylogenetic reconstruction,  
445 protein sequences were first aligned using MUSCLE (Edgar, 2004) implemented in Geneious Prime  
446 2019 (New Zealand) using default parameters. After manual inspection, geneious tree builder was  
447 applied to generate the phylogeny by using Neighbor-Joining methods (Saitou and Nei, 1987).

#### 448 **Constructs**

449 N-terminal fusions of *MtHDTs* with GFP under the control of their own promoters were constructed using  
450 MultiSite Gateway Technology (Thermo Fisher Scientific). The coding sequence (CDS) and putative  
451 promoter of each *MtHDT* were first PCR amplified by using Phusion high-fidelity DNA polymerase  
452 (Finnzymes) and nodule cDNA and genomic DNA were used as templates. The obtained PCR  
453 fragments were introduced into a pENTR-D-TOPO vector (Invitrogen). Each of the *MtHDT* promoters  
454 was cut out of the pENTR-D-TOPO vector using the NotI and AscI restriction enzymes, and then ligated  
455 with a BsaI digested pENTR4-1 vector (Invitrogen) containing GFP by using T4 DNA ligase (Thermo  
456 Fisher Scientific). The final pENTR4-1 vector with the *MtHDT* promoter and GFP, the corresponding  
457 pENTR- D-TOPO *MtHDT* CDS vector and a pENTR2-3 vector containing a CaMV35S terminator were  
458 recombined into the binary destination vector pKGW-RR-MGW thereby creating *pMtHDT::GFP::MtHDT*  
459 constructs.

460 To create *MtHDTs RNAi* constructs, the PCR fragments of about 400-500bp for each *MtHDT* CDS were  
461 amplified and then combined by subsequential PCR steps using primers with a complementary 15 bp  
462 overhang to generate one amplicon of all 3 *MtHDTs* fragments. The final product was introduced into a  
463 pENTR- D-TOPO vector (Invitrogen) and recombined in an inverted repeat orientation into the Gateway  
464 compatible binary vector pK7GWIWG2(II) driven by nodule specific *ENOD12* promoter (Limpens et al.,  
465 2005). The control vector [(*ENOD12::Empty Vector (ENOD12-EV)*] contained no coding DNA sequence.  
466 All primers used for cloning were listed in Supplemental Table S3.1 and S3.2.

#### 467 **Gene Expression And RNA-Seq**

468 Total RNA from transgenic nodules or nodule primordia was isolated using the plant RNA Easy Kit  
469 (Qiagen). cDNA was synthesized on 1µg of isolated RNA by reverse transcription with random hexamer  
470 primers using the iScript Select cDNA synthesis kit (Bio-Rad) according to the manufacturer's  
471 instructions. Quantitative real-time PCR was performed in a 10 µl reaction system with SYBR Green  
472 super-mix (Bio-Rad). Ubiquitin was used as a reference gene. Primers used for quantitative real-time  
473 PCR are listed in Supplemental Table S3.3.

474 For RNA-Seq analyses, nodule meristem and infection zone were distinguished from the fixation zone  
475 under a fluorescent stereomicroscope (Leica) and manually dissected. Three independent experiments  
476 were conducted. Total RNA was extracted as described above. RNA was sequenced at BGI Tech  
477 Solutions (Hong Kong) using HiSeq2000 instrument. Sequencing data were analysed by mapping to the  
478 Medicago genome using CLC Genomics Workbench (Denmark). Gene expression levels were  
479 determined by calculating the RPKM (Reads Per Kilobase per Million mapped reads). Differentially  
480 expressed genes (DEGs) are defined based on relatively stringent statistics and filtering (fold change>4,

481 FDR P value<0.05) within the CLC. GO enrichment analyses was performed using agriGO v2.0 (Tian  
482 et al., 2017).

### 483 **RNA *in situ* Hybridisation**

484 The nodules and nodule primordia were fixed with 4% paraformaldehyde mixed with 5%  
485 glutaraldehyde in 50 mM phosphate buffer (pH 7.4) and embedded in paraffin (Paraplast X-tra,  
486 McCormick Scientific). Sections of 7 µm were cut by RJ2035 microtome (Leica). RNA *in situ*  
487 hybridisation was performed using Invitrogen ViewRNA ISH Tissue 1-Plex Assay kit (Thermo Fisher  
488 Scientific) according to the manual protocol ([https://www.thermofisher.com/document-  
489 connect/document-connect.html?url=https%3A%2F%2Fassets.thermofisher.com%2FTFS-  
490 Assets%2FLSG%2Fmanuals%2FMAN0018633\\_viewRNA\\_ISH\\_UG.pdf&title=VXNlciBHdWlkZTogVmlld1JOQSBJU0ggVGJzc3VlIEFzc3Zl](https://www.thermofisher.com/document-connect/document-connect.html?url=https%3A%2F%2Fassets.thermofisher.com%2FTFS-Assets%2FLSG%2Fmanuals%2FMAN0018633_viewRNA_ISH_UG.pdf&title=VXNlciBHdWlkZTogVmlld1JOQSBJU0ggVGJzc3VlIEFzc3Zl)). RNA ISH probe sets were designed and produced by Thermo  
491 Fisher Scientific. Catalogue numbers of probe sets are the following: for *MtHDT1* is VF1-14234, for  
492 *MtHDT2* is VF1-18132, for *MtHDT3* is VF1-6000218 and for *MtHMGR1* is VF1-20373. Any probe set  
493 was omitted for a negative control. Slides were analysed with an AU5500B microscope equipped with  
494 a DFC425c camera (Leica).  
495

### 496 **EdU Staining**

497 The composite plants with *ENOD12-EV* or *MtHDTs RNAi* transgenic roots were grown on BNM plates  
498 and spot inoculated with *S. meliloti* 2011 as described above. After 2 days, the inoculated root segments  
499 (~0.3cm) were submerged in liquid BNM medium with extra 1g/L D-glucose and were co-incubated with  
500 10µM EdU stock for 2 hours on a shaker. The following washing and staining procedures were  
501 conducted according to (Kotogany et al., 2010).

### 502 **Microscopy And Imaging**

503 Root fragments and nodules were fixed as mentioned above. After that they were washed with 0.1 M  
504 phosphate buffer 3 times for 15 min each, once with water for 15 min, and dehydrated for 10 min in  
505 10%, 30%, 50%, 70%, 90% and 100% ethanol, and sequentially embedded in plastic Technovit 7100  
506 (Heraeus Kulzer). Sections were made of 5µm using a microtome (RJ2035, Leica), stained with 0.05%  
507 Toluidine Blue (Sigma), mounted in Euparal (Carl Roth), and analysed with a Leica AU5500B  
508 microscope equipped with a DFC425c camera (Leica). Transgenic *pMtHDT::GFP::MtHDT* nodules  
509 and root segments were sectioned into 60µm slices by vibratome (VT1000, Leica) and mounted on  
510 slides with MQ water. All confocal images were acquired using Leica SP8 confocal laser scanning  
511 microscope (Leica, Germany). GFP and EdU signal were detected with an excitation wavelength of  
512 488 nm and DsRed was detected with an excitation wavelength of 543 nm.

513

### 514 **Supplemental Material**

515 **Supplemental Figure S1.** *MtHDT3* is expressed in root tips.

- 516 **Supplemental Figure S2.** Analysis of *Mthdt* Tnt1 mutants.
- 517 **Supplemental Figure S3.** Localization of MtHDT2 resembles that of AtHDT1,2 in Arabidopsis root  
518 tips.
- 519 **Supplemental Figure S4.** Expression pattern of *ENOD11::GUS* in nodule and lateral root primordia is  
520 different.
- 521 **Supplemental Figure S5.** *MtHDT1* and *MtHDT3* are expressed in nodules and nodule primordia.
- 522 **Supplemental Figure S6.** Gene Ontology (GO) enrichment analyses of DEGs in *MtHDTs RNAi*  
523 nodule meristem and infection zone.
- 524 **Supplemental Figure S7.** Expression pattern of *ENOD12::GUS* during nodule primordium  
525 development.
- 526 **Supplemental Table S1.** Gene accessions used in the phylogenetic analysis.
- 527 **Supplemental Table S2.** The up-regulated expression of chromatin remodelling genes in Arabidopsis  
528 lateral root primordia and Medicago nodule primordia.
- 529 **Supplemental Table S3.** Primers used in this study.
- 530 **Supplemental Dataset S1.** Gene expression map in the *ENOD12-EV* and *MtHDTs RNAi* nodule  
531 meristem and infection zone.
- 532 **Supplemental Dataset S2.** *HDTs* are the only overlapped DEGs in Medicago nodules and  
533 Arabidopsis roots.

534

## 535 **ACKNOWLEDGEMENTS**

536 We thank Defeng Shen from Max Plank Institute (Cologne, Germany) for the phylogenetic  
537 construction. We would like to thank Xueyuan Leng and Nathalie Veltmaat who contributed as master  
538 students to this research.

539

## 540 **FIGURE LEGENDS.**

541 **Figure 1.** MtHDTs are orthologous to AtHDT1, 2. A, Phylogenetic tree of HDT proteins. The protein  
542 sequences are obtained from *Medicago truncatula* (Mt), *Lotus japonicus* (Lj), *Glycine max* (Gm),  
543 *Arabidopsis thaliana* (At), *Populus trichocarpa* (Pt) and *Oryza sativa* (Os). Scale bar represents  
544 substitution per site. B and C, Localization of *pMtHDT2::GFP::HDT2* (B) and *pMtHDT1::GFP::HDT1*  
545 (C) in longitudinal sections of Medicago root tips. Arrowheads indicate the boundary between root  
546 meristem and elongation zone. GFP signal is localized in nuclei. Scale bar=100µm.

547

548 **Figure 2.** *MtHDTs* are expressed in the nodule meristem and infection zone. A, Expression of *MtHDT2*  
549 mRNA visualized by *in situ* hybridisation in wild-type *Medicago* nodules. The arrowhead indicates a  
550 non-infected cell in the infection zone, the arrow indicates a cell of the first cell layer of the fixation  
551 zone where amyloplasts are detectable at the periphery. B, Localization pattern of  
552 *pMtHDT2::GFP::HDT2* in nodules. The nodule meristem zone (M), infection zone (I) and fixation zone  
553 (F) are marked. C and D, Expression of *MtHDT1* (C) and *MtHDT3* (D) mRNA visualized by *in situ*  
554 hybridisation in wild-type *Medicago* nodules. Images are longitudinal sections of nodules harvested at  
555 21dpi. Representative image is shown. In A, C and D, red dots are hybridisation signals. Scale  
556 bar=100µm.

557

558 **Figure 3.** Knock-down of *MtHDTs* affects nodule meristem functioning and rhizobial colonization. A,  
559 Reverse transcription quantitative PCR (RT-qPCR) analysis of *MtHDTs* expression in *ENOD12-EV*  
560 control and *MtHDTs RNAi* nodules. B, Nodule number formed per *ENOD12-EV* and *MtHDTs RNAi*  
561 transgenic root (n>20). C, RT-qPCR analysis of *MtPLT3, 4* expression in *ENOD12-EV* control and  
562 *MtHDTs RNAi* nodules. D and E, Morphology of *ENOD12-EV* (D) and *MtHDTs RNAi* (E) nodules  
563 studied by light microscopy. Representative longitudinal sections are shown. The nodule meristem  
564 (M), infection zone (I) and fixation zone (F) are marked. Scale bar=100µm. F, Number of cell layers  
565 derived from nodule meristem in *ENOD12-EV* and *MtHDTs RNAi* transgenic nodules (n>15). Nodules  
566 were harvested at 21dpi. Panels in A and C show mean±SEM determined from three independent  
567 experiments. Asterisks in B and F indicate significant differences (\*\*\*, p<0.001; Student's *t* test).

568

569 **Figure 4.** Knock-down of *MtHDTs* blocks nodule primordium development. A, Analysis of  
570 developmental stages of 5dpi *ENOD12-EV* (n=87) and *MtHDTs RNAi* (n=86) nodule primordia. B,  
571 Percentage of EdU labelled nodule primordium cells in 2dpi *ENOD12-EV* (n=15) and *MtHDTs RNAi*  
572 (n=7) nodule primordia. Nodule primordium cells were defined as divided or dividing cells that have  
573 smaller size. 8 *MtHDTs RNAi* nodule primordia have no EdU labelling and are not used for statistics.  
574 Asterisk indicates significant differences (\*\*\*, p<0.001; Student's *t* test). C and D, EdU signals in 2dpi  
575 *ENOD12-EV* (C) and *MtHDTs RNAi* (D) nodule primordia. Arrowheads indicate strong (C) or weak (D)  
576 green fluorescent signals in nuclei. Identical confocal microscope settings were used in C and D. P,  
577 Pericycle; En, Endodermis; C<sub>5/4/3/2/1</sub>, the fifth/fourth/third/second/first cortical cell layer; Ep, Epidermis.  
578 Scale bar=100µm.

579

580 **Figure 5.** *MtHDT2* is expressed in nodule primordia. *In situ* hybridisation pattern of *MtHDT2* mRNA in  
581 nodule primordia at stage I (A) and stage III (B). Longitudinal sections of wild-type nodule primordia  
582 are shown. Red dots are hybridisation signals. Divided and dividing primordium cells are distinguished

583 by their small size. Arrowhead in B indicates a nucleus from an endodermal cell that has not divided.  
584 P, Pericycle; En, Endodermis; C<sub>5/4/3</sub>, the fifth/fourth/third cortical cell layer. Scale bar=100µm.

585

586 **Figure 6.** MtHDTs regulate the expression of *MtHMGR1*. A and B, *In situ* hybridisation pattern of  
587 *MtHMGR1* mRNA in *ENOD12-EV* (A) and *MtHDTs RNAi* (B) nodules. Arrowheads indicate infected  
588 cells in the infection zone. C and D, *In situ* hybridisation pattern of *MtHMGR1* mRNA in *ENOD12-EV*  
589 (C) and *MtHDTs RNAi* (D) nodule primordia. Arrows indicate non-infected cells. E, *In situ* hybridisation  
590 pattern of *MtHDT2* mRNA in wild-type nodule primordium. The arrow indicates a non-infected cell. F,  
591 RT-qPCR analysis of *MtHMGR1* expression in *ENOD12-EV* control and *MtHDTs RNAi* nodule  
592 primordia. Data shown is mean±SEM determined from three independent experiments. Nodules and  
593 nodule primordia were harvested at 21 dpi and 5dpi, respectively. In A to E longitudinal sections of  
594 nodules (A and B) or nodule primordia (C to E) were shown. Red dots are hybridisation signals. Scale  
595 bar=100µm.

596

## 597 LITERATURE CITED

- 598 **Aida M, Beis D, Heidstra R, Willemsen V, Blilou I, Galinha C, Nussaume L, Noh YS, Amasino R,**  
599 **Scheres B** (2004) The PLETHORA genes mediate patterning of the Arabidopsis root stem cell niche.  
600 *Cell* **119**: 109-120
- 601 **Benedito VA, Torres-Jerez I, Murray JD, Andriankaja A, Allen S, Kakar K, Wandrey M, Verdier J,**  
602 **Zuber H, Ott T, Moreau S, Niebel A, Frickey T, Weiller G, He J, Dai XB, Zhao PX, Tang YH,**  
603 **Udvardi MK** (2008) A gene expression atlas of the model legume *Medicago truncatula*. *Plant Journal*  
604 **55**: 504-513
- 605 **Boisson-Dernier A, Andriankaja A, Chabaud M, Niebel A, Journet EP, Barker DG, de Carvalho-Niebel F**  
606 (2005) MtENOD11 gene activation during rhizobial infection and mycorrhizal arbuscule development  
607 requires a common AT-rich-containing regulatory sequence. *Mol Plant Microbe Interact* **18**: 1269-1276
- 608 **Chappell J, Wolf F, Proulx J, Cuellar R, Saunders C** (1995) Is the Reaction Catalyzed by 3-Hydroxy-3-  
609 Methylglutaryl Coenzyme-a Reductase a Rate-Limiting Step for Isoprenoid Biosynthesis in Plants. *Plant*  
610 *Physiology* **109**: 1337-1343
- 611 **Combier JP, Frugier F, de Billy F, Boualem A, El-Yahyaoui F, Moreau S, Vernie T, Ott T, Gamas P,**  
612 **Crespi M, Niebel A** (2006) MtHAP2-1 is a key transcriptional regulator of symbiotic nodule  
613 development regulated by microRNA169 in *Medicago truncatula*. *Genes & Development* **20**: 3084-3088
- 614 **De Smet I, Vassileva V, De Rybel B, Levesque MP, Grunewald W, Van Damme D, Van Noorden G,**  
615 **Naudts M, Van Isterdael G, De Clercq R, Wang JY, Meuli N, Vanneste S, Friml J, Hilson P,**  
616 **Jurgens G, Ingram GC, Inze D, Benfey PN, Beeckman T** (2008) Receptor-like kinase ACR4  
617 restricts formative cell divisions in the Arabidopsis root. *Science* **322**: 594-597
- 618 **Ding B, Bellizzi MD, Ning YS, Meyers BC, Wang GL** (2012) HDT701, a Histone H4 Deacetylase, Negatively  
619 Regulates Plant Innate Immunity by Modulating Histone H4 Acetylation of Defense-Related Genes in  
620 Rice. *Plant Cell* **24**: 3783-3794
- 621 **Dubrovsky JG, Rost TL, Colon-Carmona A, Doerner P** (2001) Early primordium morphogenesis during  
622 lateral root initiation in *Arabidopsis thaliana*. *Planta* **214**: 30-36
- 623 **Edgar RC** (2004) MUSCLE: multiple sequence alignment with high accuracy and high throughput. *Nucleic Acids*  
624 *Research* **32**: 1792-1797
- 625 **Ehrhardt DW, Atkinson EM, Long SR** (1992) Depolarization of Alfalfa Root Hair Membrane-Potential by  
626 *Rhizobium-Meliloti* Nod Factors. *Science* **256**: 998-1000
- 627 **Fahraeus G** (1957) The Infection of Clover Root Hairs by Nodule Bacteria Studied by a Simple Glass Slide  
628 Technique. *Journal of General Microbiology* **16**: 374-&
- 629 **Franssen HJ, Vijn I, Yang WC, Bisseling T** (1992) Developmental aspects of the *Rhizobium-legume*  
630 symbiosis. *Plant Mol Biol* **19**: 89-107
- 631 **Franssen HJ, Xiao TT, Kulikova O, Wan X, Bisseling T, Scheres B, Heidstra R** (2015) Root developmental  
632 programs shape the *Medicago truncatula* nodule meristem. *Development* **142**: 2941-+
- 633 **Gavrin A, Kaiser BN, Geiger D, Tyerman SD, Wen ZY, Bisseling T, Fedorova EE** (2014) Adjustment of  
634 Host Cells for Accommodation of Symbiotic Bacteria: Vacuole Defunctionalization, HOPS Suppression,  
635 and TIP1g Retargeting in *Medicago*. *Plant Cell* **26**: 3809-3822

- 636 **Goh T, Joi S, Mimura T, Fukaki H** (2012) The establishment of asymmetry in Arabidopsis lateral root founder  
637 cells is regulated by LBD16/ASL18 and related LBD/ASL proteins. *Development* **139**: 883-893
- 638 **Grandperret V, Nicolas-Frances V, Wendehenne D, Bourque S** (2014) Type-II histone deacetylases:  
639 elusive plant nuclear signal transducers. *Plant Cell and Environment* **37**: 1259-1269
- 640 **Han ZF, Yu HM, Zhao Z, Hunter D, Luo XJ, Duan J, Tian LN** (2016) AtHD2D Gene Plays a Role in Plant  
641 Growth, Development, and Response to Abiotic Stresses in Arabidopsis thaliana. *Frontiers in Plant*  
642 *Science* **7**
- 643 **Jarillo JA, Pineiro M, Cubas P, Martinez-Zapater JM** (2009) Chromatin remodeling in plant development.  
644 *International Journal of Developmental Biology* **53**: 1581-1596
- 645 **Journet EP, El-Gachtouli N, Vernoud V, de Billy F, Pichon M, Dedieu A, Arnould C, Morandi D, Barker**  
646 **DG, Gianinazzi-Pearson V** (2001) *Medicago truncatula* ENOD11: A novel RPRP-encoding early  
647 nodulin gene expressed during mycorrhization in arbuscule-containing cells. *Molecular Plant-Microbe*  
648 *Interactions* **14**: 737-748
- 649 **Kevei Z, Loughn G, Mergaert P, Horvath GV, Kereszt A, Jayaraman D, Zaman N, Marcel F, Regulski**  
650 **K, Kiss GB, Kondorosi A, Endre G, Kondorosi E, Ane JM** (2007) 3-hydroxy-3-methylglutaryl  
651 coenzyme A reductase1 interacts with NORK and is crucial for nodulation in *Medicago truncatula*. *Plant*  
652 *Cell* **19**: 3974-3989
- 653 **Kotogany E, Dudits D, Horvath GV, Ayaydin F** (2010) A rapid and robust assay for detection of S-phase cell  
654 cycle progression in plant cells and tissues by using ethynyl deoxyuridine. *Plant Methods* **6**
- 655 **Kouzarides T** (2007) Chromatin modifications and their function. *Cell* **128**: 693-705
- 656 **Laporte P, Lepage A, Fournier J, Catrice O, Moreau S, Jardinaud MF, Mun JH, Larrainzar E, Cook DR,**  
657 **Gamas P, Niebel A** (2014) The CCAAT box-binding transcription factor NF-YA1 controls rhizobial  
658 infection. *Journal of Experimental Botany* **65**: 481-494
- 659 **Li HC, Torres-Garcia J, Latrasse D, Benhamed S, Schilderink S, Zhou WK, Kulikova O, Hirt H,**  
660 **Bisseling T** (2017) Plant-Specific Histone Deacetylases HDT1/2 Regulate GIBBERELLIN 2-OXIDASE2  
661 Expression to Control Arabidopsis Root Meristem Cell Number. *Plant Cell* **29**: 2183-2196
- 662 **Limpens E, Mirabella R, Fedorova E, Franken C, Franssen H, Bisseling T, Geurts R** (2005) Formation of  
663 organelle-like N<sub>2</sub>-fixing symbiosomes in legume root nodules is controlled by DMI2. *Proc Natl Acad Sci*  
664 *U S A* **102**: 10375-10380
- 665 **Limpens E, Ramos J, Franken C, Raz V, Compaan B, Franssen H, Bisseling T, Geurts R** (2004) RNA  
666 interference in *Agrobacterium rhizogenes*-transformed roots of *Arabidopsis* and *Medicago truncatula*.  
667 *Journal of Experimental Botany* **55**: 983-992
- 668 **Malamy JE, Benfey PN** (1997) Organization and cell differentiation in lateral roots of *Arabidopsis thaliana*.  
669 *Development* **124**: 33-44
- 670 **Marsh JF, Rakocevic A, Mitra RM, Brocard L, Sun J, Eschstruth A, Long SR, Schultze M, Ratet P,**  
671 **Oldroyd GED** (2007) *Medicago truncatula* NIN is essential for rhizobial-independent nodule  
672 organogenesis induced by autoactive calcium/calmodulin-dependent protein kinase. *Plant Physiology*  
673 **144**: 324-335
- 674 **Moling S, Pietraszewska-Bogiel A, Postma M, Fedorova E, Hink MA, Limpens E, Gadella TWJ,**  
675 **Bisseling T** (2014) Nod Factor Receptors Form Heteromeric Complexes and Are Essential for  
676 Intracellular Infection in *Medicago* Nodules. *Plant Cell* **26**: 4188-4199
- 677 **Pandey R, Muller A, Napoli CA, Selinger DA, Pikaard CS, Richards EJ, Bender J, Mount DW, Jorgensen**  
678 **RA** (2002) Analysis of histone acetyltransferase and histone deacetylase families of *Arabidopsis*  
679 *thaliana* suggests functional diversification of chromatin modification among multicellular eukaryotes.  
680 *Nucleic Acids Research* **30**: 5036-5055
- 681 **Roux B, Rodde N, Jardinaud MF, Timmers T, Sauviac L, Cottret L, Carrere S, Sallet E, Courcelle E,**  
682 **Moreau S, Debelle F, Capela D, de Carvalho-Niebel F, Gouzy J, Bruand C, Gamas P** (2014) An  
683 integrated analysis of plant and bacterial gene expression in symbiotic root nodules using laser-capture  
684 microdissection coupled to RNA sequencing. *Plant Journal* **77**: 817-837
- 685 **Saitou N, Nei M** (1987) The Neighbor-Joining Method - a New Method for Reconstructing Phylogenetic Trees.  
686 *Molecular Biology and Evolution* **4**: 406-425
- 687 **Satge C, Moreau S, Sallet E, Lefort G, Auriac MC, Rembliere C, Cottret L, Gallardo K, Noirot C,**  
688 **Jardinaud MF, Gamas P** (2016) Reprogramming of DNA methylation is critical for nodule  
689 development in *Medicago truncatula*. *Nature Plants* **2**
- 690 **Schiessl K, Lilley JLS, Lee T, Tamvakis I, Kohlen W, Bailey PC, Thomas A, Luptak J, Ramakrishnan K,**  
691 **Carpenter MD, Mysore KS, Wen JQ, Ahnert S, Grieneisen VA, Oldroyd GED** (2019) NODULE  
692 INCEPTION Recruits the Lateral Root Developmental Program for Symbiotic Nodule Organogenesis in  
693 *Medicago truncatula*. *Current Biology* **29**: 3657-+
- 694 **Soyano T, Shimoda Y, Kawaguchi M, Hayashi M** (2019) A shared gene drives lateral root development and  
695 root nodule symbiosis pathways in *Lotus*. *Science* **366**: 1021-+
- 696 **Tian T, Liu Y, Yan HY, You Q, Yi X, Du Z, Xu WY, Su Z** (2017) agriGO v2.0: a GO analysis toolkit for the  
697 agricultural community, 2017 update. *Nucleic Acids Research* **45**: W122-W129
- 698 **Udvardi M, Poole PS** (2013) Transport and metabolism in legume-rhizobia symbioses. *Annu Rev Plant Biol*  
699 **64**: 781-805
- 700 **Ueno Y, Ishikawa T, Watanabe K, Terakura S, Iwakawa H, Okada K, Machida C, Machida Y** (2007)  
701 Histone deacetylases and ASYMMETRIC LEAVES2 are involved in the establishment of polarity in leaves  
702 of *Arabidopsis*. *Plant Cell* **19**: 445-457
- 703 **van den Berg C, Willemsen V, Hage W, Weisbeek P, Scheres B** (1995) Cell fate in the *Arabidopsis* root  
704 meristem determined by directional signalling. *Nature* **378**: 62-65
- 705 **van Velzen R, Holmer R, Bu FJ, Rutten L, van Zeijl A, Liu W, Santuari L, Cao QQ, Sharma T, Shen DF,**  
706 **Roswanjaya Y, Wardhani TAK, Kalhor MS, Jansen J, van den Hoogen J, Gungor B, Hartog M,**  
707 **Hontelez J, Verver J, Yang WC, Schijlen E, Repin R, Schilthuizen M, Schranz ME, Heidstra R,**

708 **Miyata K, Fedorova E, Kohlen W, Bisseling T, Smit S, Geurts R** (2018) Comparative genomics of  
709 the nonlegume *Parasponia* reveals insights into evolution of nitrogen-fixing rhizobium symbioses.  
710 *Proceedings of the National Academy of Sciences of the United States of America* **115**: E4700-E4709  
711 **Vanstraelen M, Baloban M, Da Ines O, Cultrone A, Lammens T, Boudolf V, Brown SC, De Veylder L,**  
712 **Mergaert P, Kondorosi E** (2009) APC/C-CCS52A complexes control meristem maintenance in the  
713 *Arabidopsis* root. *Proceedings of the National Academy of Sciences of the United States of America*  
714 **106**: 11806-11811  
715 **Venkateshwaran M, Jayaraman D, Chabaud M, Genre A, Balloon AJ, Maeda J, Forshey K, den Os D,**  
716 **Kwiecien NW, Coon JJ, Barker DG, Ane JM** (2015) A role for the mevalonate pathway in early plant  
717 symbiotic signaling. *Proceedings of the National Academy of Sciences of the United States of America*  
718 **112**: 9781-9786  
719 **Vinardell JM, Fedorova E, Cebolla A, Kevei Z, Horvath G, Kelemen Z, Tarayre S, Roudier F, Mergaert**  
720 **P, Kondorosi A, Kondorosi E** (2003) Endoreduplication mediated by the anaphase-promoting  
721 complex activator CCS52A is required for symbiotic cell differentiation in *Medicago truncatula* nodules.  
722 *Plant Cell* **15**: 2093-2105  
723 **Xiao TT, Schilderink S, Moling S, Deinum EE, Kondorosi E, Franssen H, Kulikova O, Niebel A, Bisseling**  
724 **T** (2014) Fate map of *Medicago truncatula* root nodules. *Development* **141**: 3517-3528  
725 **Xiao TT, van Velzen R, Kulikova O, Franken C, Bisseling T** (2019) Lateral root formation involving cell  
726 division in both pericycle, cortex and endodermis is a common and ancestral trait in seed plants.  
727 *Development* **146**

728

729
